# Supplementary material for: Emergence of infectious malignant thrombocytopenia in Japanese macaques (Macaca fuscata) by SRV-4 after transmission to a novel host
Source: PubMed Central journal article supplement (PMC4351523; doi:10.1038/srep08850), 2015-03-06

## Supplementary Information

### Emergence of infectious malignant thrombocytopenia in Japanese macaques (*Macaca fuscata*) by SRV-4 after transmission to a novel host

Munehiro Okamoto<sup>1\*</sup>, Takayuki Miyazawa<sup>2</sup>, Shigeru Morikawa<sup>3</sup>, Fumiko Ono<sup>4</sup>, Shota Nakamura<sup>5</sup>, Eiji Sato<sup>1</sup>, Tomoyuki Yoshida<sup>1</sup>, Rokusuke Yoshikawa<sup>2</sup>, Kouji Sakai<sup>3</sup>, Tetsuya Mizutani<sup>3</sup>, Noriyo Nagata<sup>3</sup>, Jun-ichiro Takano<sup>4,6</sup>, Sachi Okabayashi<sup>4</sup>, Masataka Hamano<sup>4</sup>, Koji Fujimoto<sup>4</sup>, Takaaki Nakaya<sup>5,7</sup>, Testuya Iida<sup>5</sup>, Toshihiro Horii<sup>5,8</sup>, Takako Miyabe-Nishiwaki<sup>1</sup>, Akino Watanabe<sup>1</sup>, Akihisa Kaneko<sup>1</sup>, Akatsuki Saito<sup>1</sup>, Atsushi Matsui<sup>1</sup>, Toshiyuki Hayakawa<sup>1</sup>, Juri Suzuki<sup>1</sup>, Hirofumi Akari<sup>1</sup>, Tetsuro Matsuzawa<sup>9</sup> & Hirohisa Hirai<sup>10</sup>

<sup>1</sup>Center for Human Evolution Modeling Research, Primate Research Institute, Kyoto University, Inuyama, Aichi 484-8506, Japan

<sup>2</sup>Laboratory of Signal Transduction, Department of Cell Biology, Institute for Virus Research, Kyoto University, Kyoto 606-8507, Japan.

<sup>3</sup>National Institute of Infectious Diseases, Toyama 1-23-1, Shinjuku-ku, Tokyo 162-8640, Japan

<sup>4</sup>The Corporation for Production and Research of Laboratory Primates, 1-16-2 Sakura, Tsukuba, Ibaraki 305-0003, Japan

<sup>5</sup>Department of Infection Metagenomics, Genome Information Research Center, Research Institute for Microbial Diseases, Osaka University, 3-1 Yamadaoka, Suita, Osaka 565-0871, Japan

<sup>6</sup>Tsukuba Primate Research Center, National Institute of Biomedical Innovation, 1-1 Hachimandai Tsukuba, Ibaraki 305-0843, Japan

<sup>7</sup>Department of Infectious Diseases, Kyoto Prefectural University of Medicine, 465 Kawaramachi-hirokoji, Kamigyo-ku, Kyoto, Japan

<sup>8</sup>Department of Molecular Protozoology, Research Institute for Microbial Diseases, Osaka University, Suita, Osaka, Japan

<sup>9</sup>Department of Brain and Behavioral Sciences, Primate Research Institute, Kyoto University, Inuyama, Aichi 484-8506, Japan

<sup>10</sup>Department of Molecular Biology, Primate Research Institute, Kyoto

University, Inuyama, Aichi 484-8506, Japan

## Supplementary Figure Legends:

**Supplementary Figure S1. Metagenomic detection of SRV-4 in plasma of a Japanese macaque.** 485 detected sequence reads were mapped onto the reference genome of SRV-4 (GenBank ID: FJ971077). The upper box represents the SRV-4 genome. Sequence reads detected are shown as bars colored by homology (% identity). Detected positions are colored in the box of the genome cumulatively.

Fig. S1

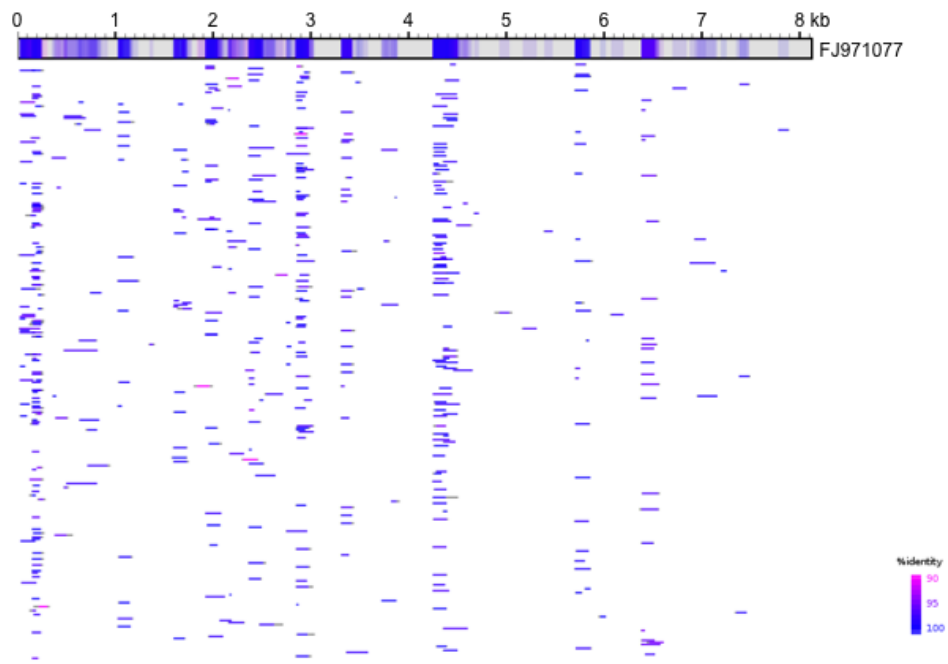

Supplement: srep08850-s1.pdf [file srep08850-s1.pdf]
